# Supplementary material for: Surface modification of a PES membrane by corona air plasma-assisted grafting of HB-PEG for separation of oil-in-water emulsions
Source: Royal Society of Chemistry journal article supplement (doi:10.1039/d0ra02032j), 2020-01-01
Supplement: d0ra02032j1.pdf [file d0ra02032j1.pdf]

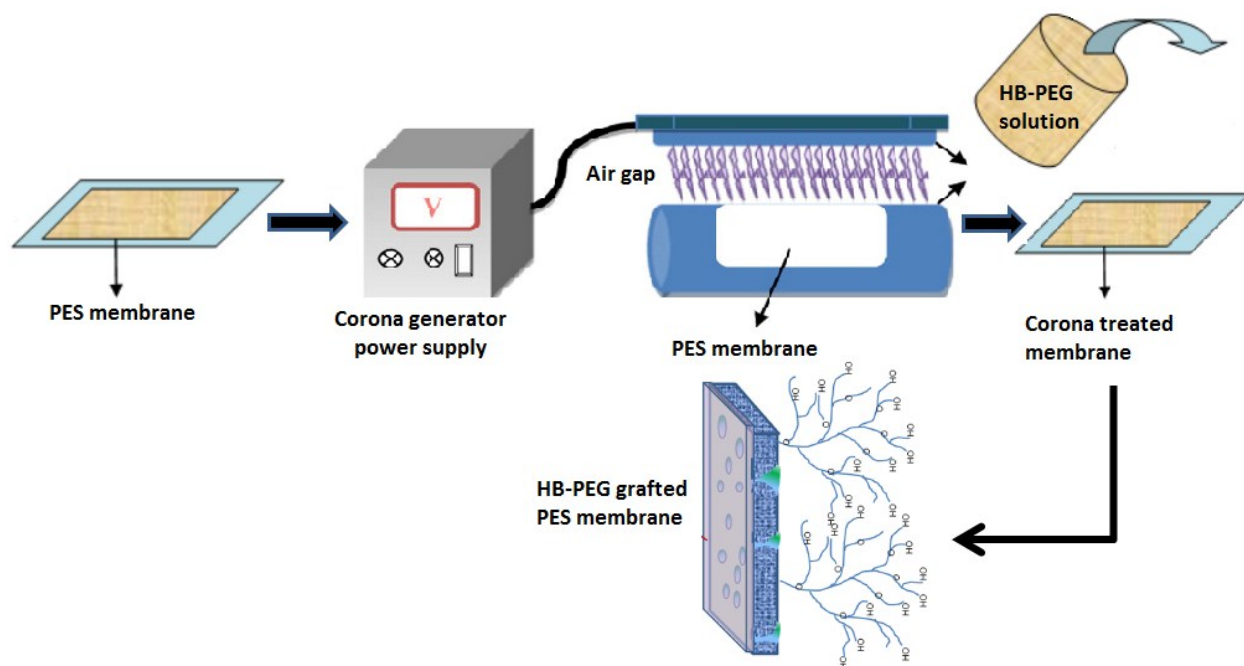

**Fig. S1** The schematic of the grafting process.

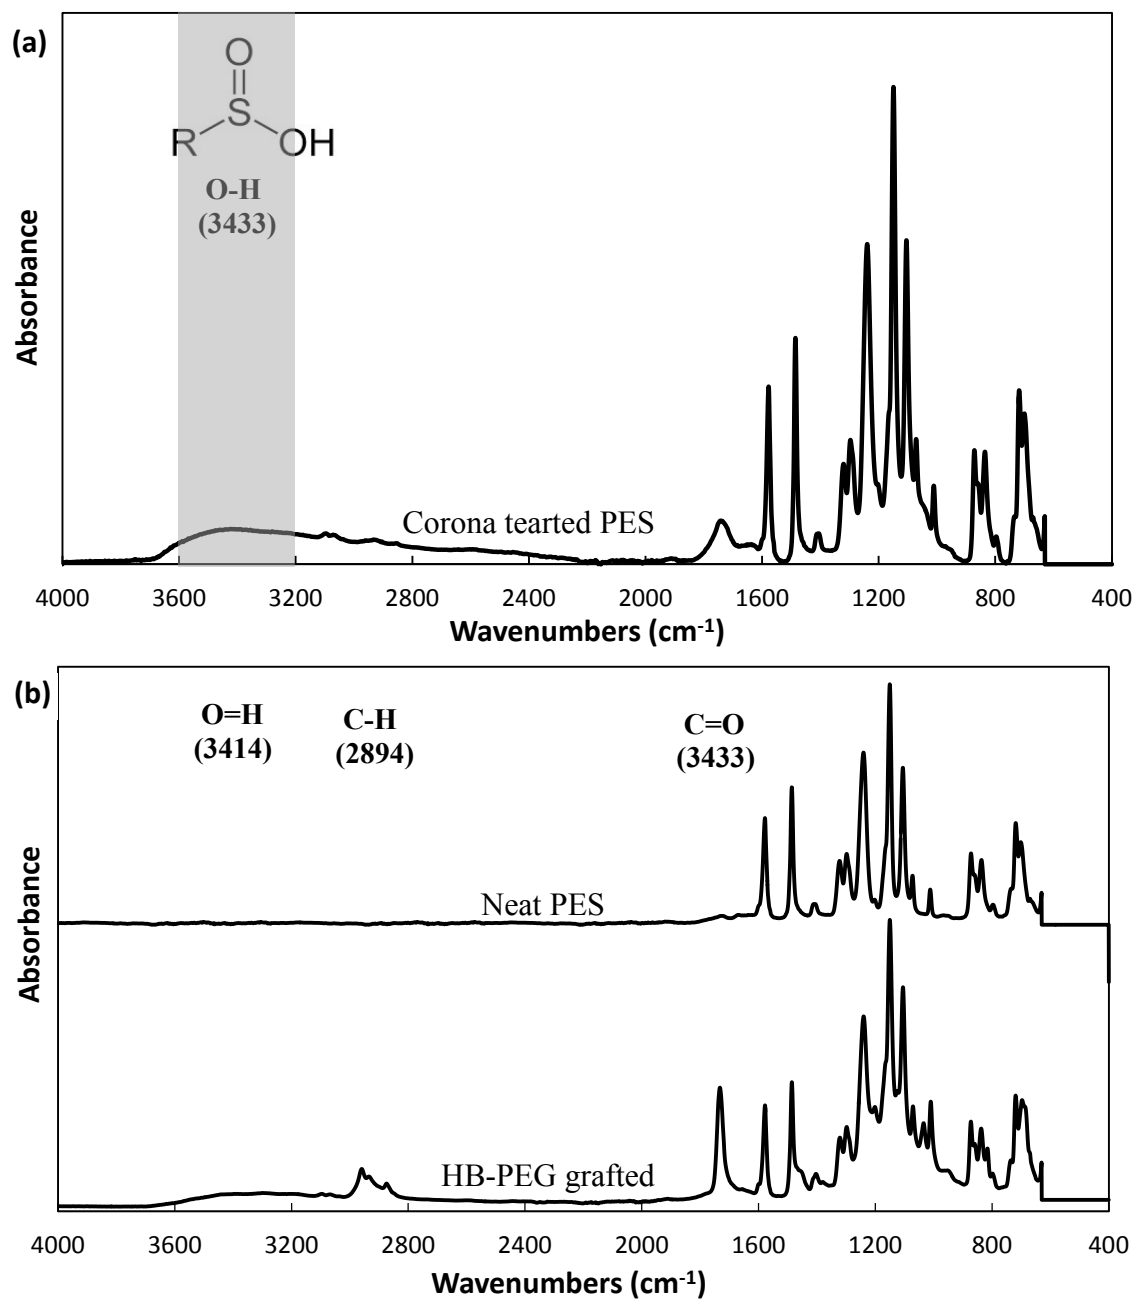

**Fig. S2** The FTIR spectra of the corona treated PES membrane (a), neat PES membrane (b) and HB-PEG grafted PES membrane (c).

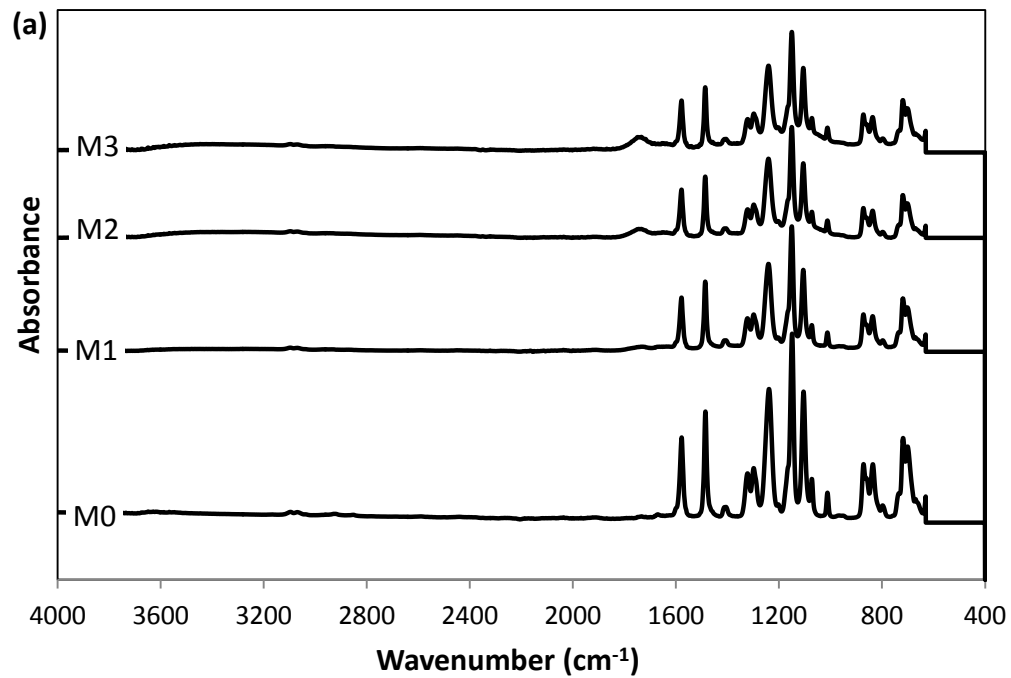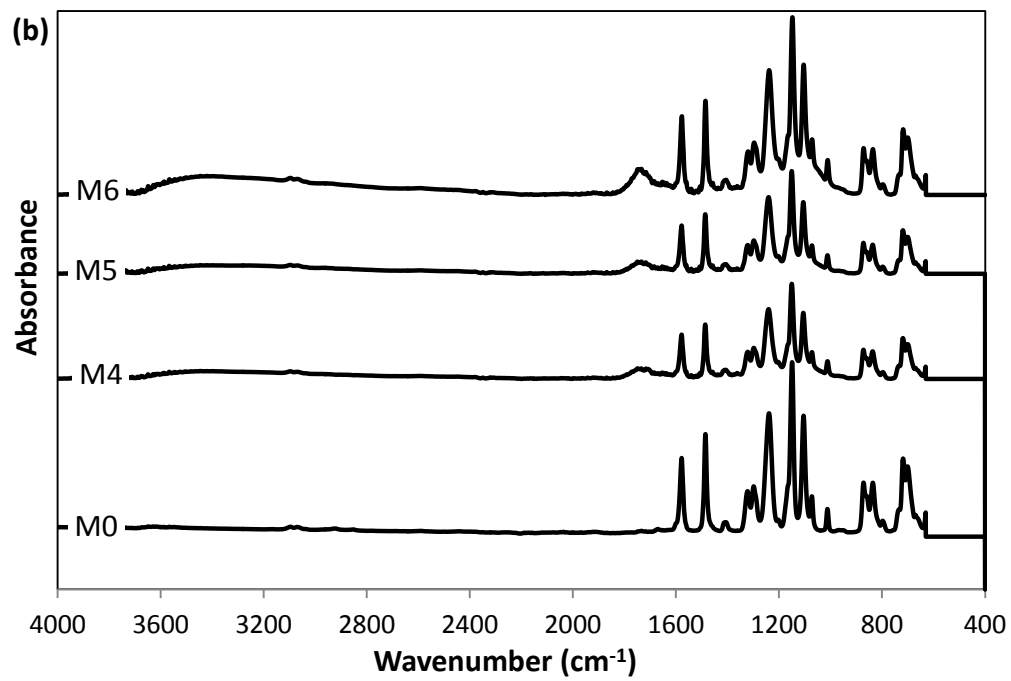

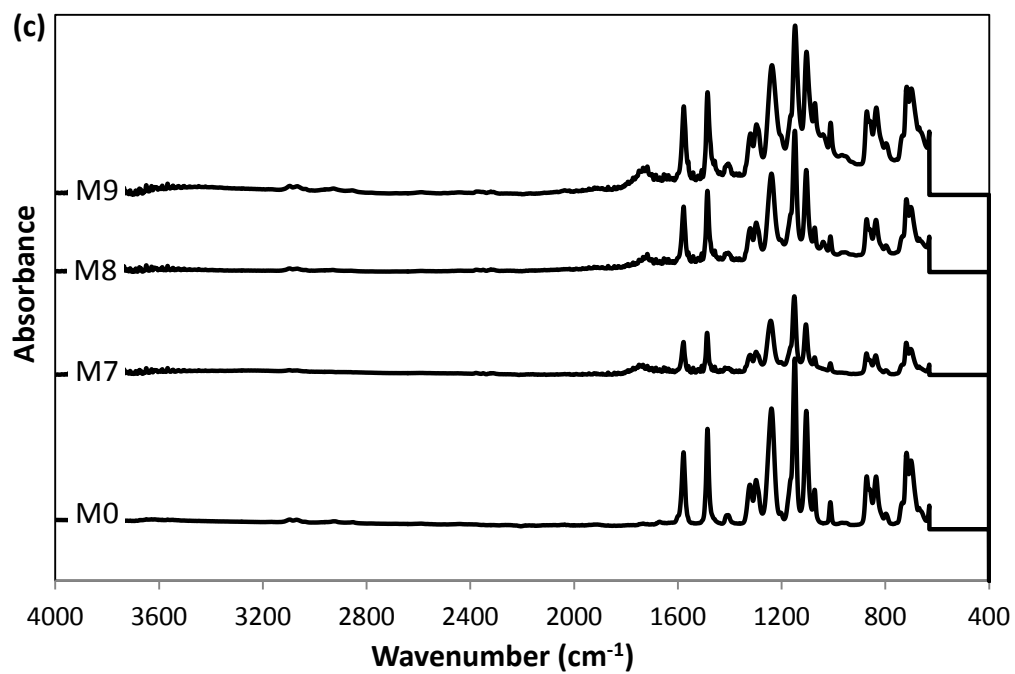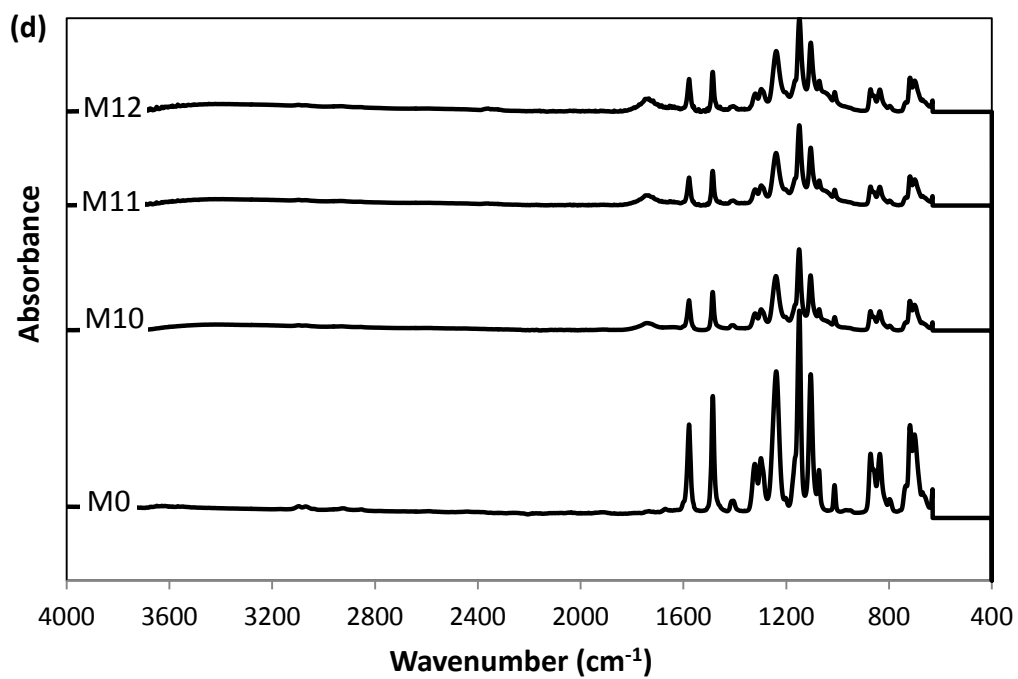

**Fig. S3** The FTIR spectra of the HB-PEG grafted PES membranes treated at corona input power of 180W (a), 270W (b), 360W (c) and 450W (d).

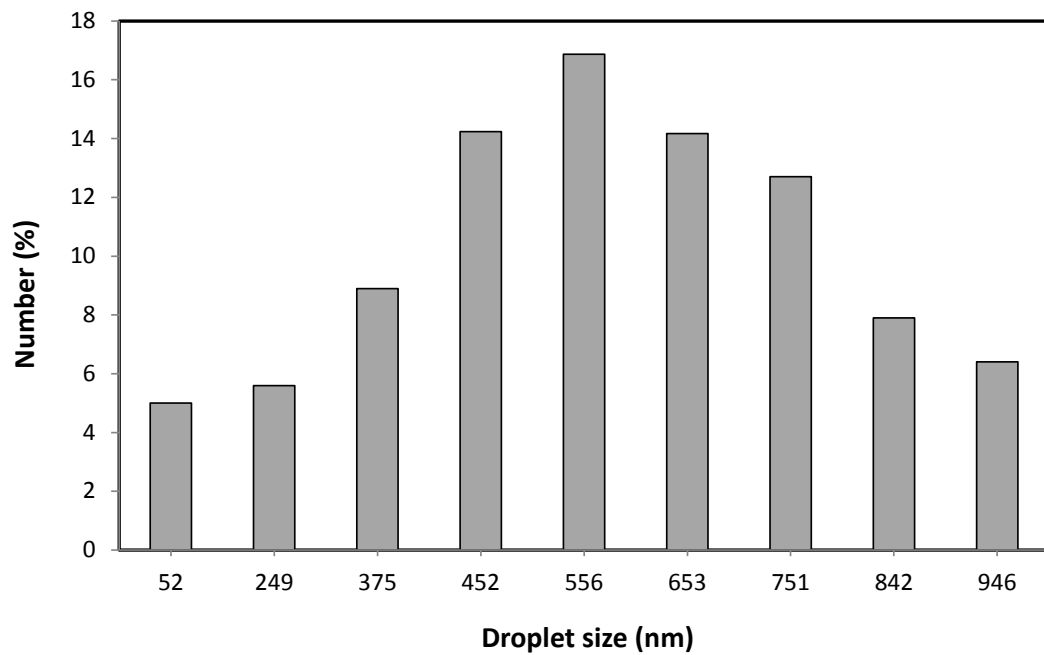

**Fig. S4** The size distribution of the oil droplets in the feed stream.
